# Supplementary material for: Protoplast-Esculin Assay as a New Method to Assay Plant Sucrose Transporters: Characterization of AtSUC6 and AtSUC7 Sucrose Uptake Activity in Arabidopsis Col-0 Ecotype
Source: PubMed Central journal article supplement (PMC5925572; doi:10.3389/fpls.2018.00430), 2018-04-23
Supplement: Data_Sheet_1.pdf [file Data_Sheet_1.pdf]

# Protoplast-Esculin Assay as a New Method to Assay Plant Sucrose Transporters: Characterization of AtSUC6 and AtSUC7 Sucrose Uptake Activity in Arabidopsis Col-0 Ecotype

Theresa Rottmann, Carolin Fritz, Anja Lauter, Sabine Schneider, Cornelia Fischer, Nina Danzberger, Petra Dietrich, Norbert Sauer and Ruth Stadler

**Supplementary Table 1:** List of primers used for the detection of *AtSUC* transcripts in different tissues by RT-PCR.

| Gene                 | Primer name   | Primer sequence                              |
|----------------------|---------------|----------------------------------------------|
| <b><i>AtSUC6</i></b> | AtSUC6c+911f  | 5'-GTCGTGAGGTGTACGGTGGAGAC-3'                |
|                      | AtSUC6c+1521r | 5'-CATGTATGGGTCCCTTATCTAGTGCTACAATAA-3'      |
| <b><i>AtSUC7</i></b> | AtSUC7c+1032f | 5'-TGGTATTGAAGGTATTAGTTAGGAAGATGGGA-3'       |
|                      | AtSUC7c+1507r | 5'-GCATATATAATAAATAAAAACGCATAAACTTTTTAAGG-3' |
| <b><i>ACTIN2</i></b> | AtACT2g+846f  | 5'-ATTCAGATGCCCAGAAGTCTTGTT-3'               |
|                      | AtACT2g+1295r | 5'-GAAACATTTTCTGTGAACGATTCT-3'               |

**Supplementary Table 2:** Primers used for PCR based genotyping of T-DNA insertion lines.

| Mutant line                         | Amplified allele | Primer name       | Primer sequence                              |
|-------------------------------------|------------------|-------------------|----------------------------------------------|
| <b><i>Atsuc6.1</i></b>              | WT allele        | AtSUC6-718f       | 5'-GAGGGAGACTGATTCCGCCG-3'                   |
|                                     |                  | AtSUC6c+622r      | 5'-GCGCAATAGATGTCGCATGCTT-3'                 |
|                                     | mutant allele    | SALK-LBb1.3       | 5'-ATTTTGCCGATTTTCGGAAC-3'                   |
|                                     |                  | AtSUC6c+622r      | 5'-GCGCAATAGATGTCGCATGCTT-3'                 |
| <b><i>Atsuc6.2</i></b>              | WT allele        | AtSUC6g+1406f     | 5'-GCAGTCCGGTGCCG-3'                         |
|                                     |                  | AtSUC6c+1521r     | 5'-CATGTATGGGTCCCTTATCTAGTGCTACAATAA-3'      |
|                                     | mutant allele    | SALK-LBb1.3       | 5'-ATTTTGCCGATTTTCGGAAC-3'                   |
|                                     |                  | AtSUC6c+1521r     | 5'-CATGTATGGGTCCCTTATCTAGTGCTACAATAA-3'      |
| <b><i>Atsuc6.3&amp;Atsuc6.4</i></b> | WT allele        | AtSUC6g+911f      | 5'-GTCGTGAGGTGTACGGTGGAGAC-3'                |
|                                     |                  | AtSUC6g+1530r     | 5'-CGTAAAGTAGAGATAATTGGAAACCGATCTC-3'        |
|                                     | mutant allele    | Spm32             | 5'-TACGAATAAGAGCGTCCATTTTAGAGTGA-3'          |
|                                     |                  | AtSUC6g+1530r     | 5'-CGTAAAGTAGAGATAATTGGAAACCGATCTC-3'        |
| <b><i>Atsuc7.1</i></b>              | WT allele        | AtSUC7-617f       | 5'-TTGATAACGTACAGCCAAGACATTTGATT-3'          |
|                                     |                  | AtSUC7-27r        | 5'-GGTCACTCATCTTCTTCACCCTTGCTT-3'            |
|                                     | mutant allele    | GABI-Kat LB o8474 | 5'-ATAATAACGCTGCGGACATCTACATTTT-3'           |
|                                     |                  | AtSUC7-27r        | 5'-GGTCACTCATCTTCTTCACCCTTGCTT-3'            |
| <b><i>Atsuc7.2</i></b>              | WT allele        | AtSUC7-617f       | 5'-TTGATAACGTACAGCCAAGACATTTGATT-3'          |
|                                     |                  | AtSUC7c+223r      | 5'-GACCGCAAAGCCAAATGAAAGATG-3'               |
|                                     | mutant allele    | AtSUC7-617f       | 5'-TTGATAACGTACAGCCAAGACATTTGATT-3'          |
|                                     |                  | SAIL_LB3          | 5'-TAGCATCTGAATTTCAACCAATCTCGATACAC-3'       |
| <b><i>Atsuc7.3</i></b>              | WT allele        | AtSUC7g+1394f     | 5'-GGCGCCGGTCAAAGTATTTTAAAC-3'               |
|                                     |                  | AtSUC7c+1507r     | 5'-GCATATATAATAAATAAAAACGCATAAACTTTTTAAGG-3' |
|                                     | mutant allele    | GABI-Kat LB o8474 | 5'-ATAATAACGCTGCGGACATCTACATTTT-3'           |
|                                     |                  | AtSUC7c+1507r     | 5'-GCATATATAATAAATAAAAACGCATAAACTTTTTAAGG-3' |

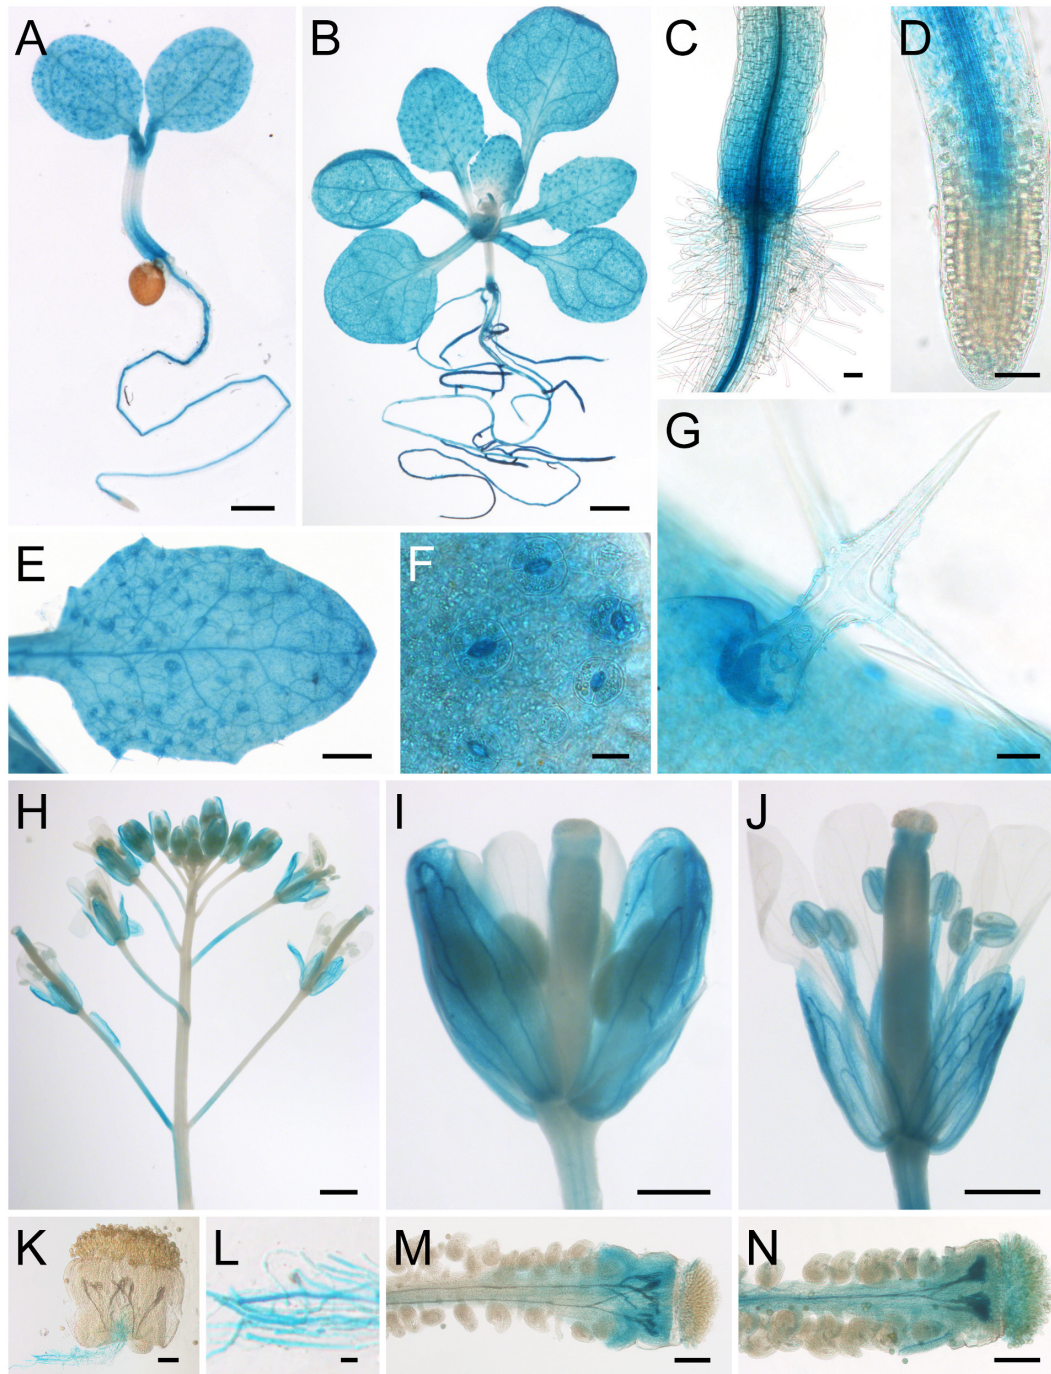

**Supplementary Figure 1: Analysis of *AtSUC7*<sub>Col-0</sub> promoter activity by histochemical detection of  $\beta$ -glucuronidase localization in *pAtSUC7:GUS* plants. (A) 5-day-old seedling with GUS staining in roots, hypocotyl and cotyledons. (B) 2-week-old seedling. (C) Hypocotyl and proximal root end of 5-day-old seedling at higher magnification showing GUS activity especially in the vascular tissue. (D) Lateral root with GUS staining absent from the tip. (E) Source leaf. (F) Epidermis with guard cells at higher magnification. (G) Trichome with strong GUS staining at the base. (H) Inflorescence with flowers of different developmental stages. (I) Unpollinated flower with GUS staining in the sepals. (J) Pollinated flower. (K) Pollen tubes grown semi-*in vivo* through a WT stigma. (L) Pollen tubes at higher magnification. (M, N) Peeled ovary of an unpollinated (M) or a pollinated (N) flower. Scale bars: 1 mm in A, B and H; 50  $\mu$ m in C, D and K; 2.5 mm in E; 20  $\mu$ m in F, G and L; 500  $\mu$ m in I and J; 100  $\mu$ m in M and N.**

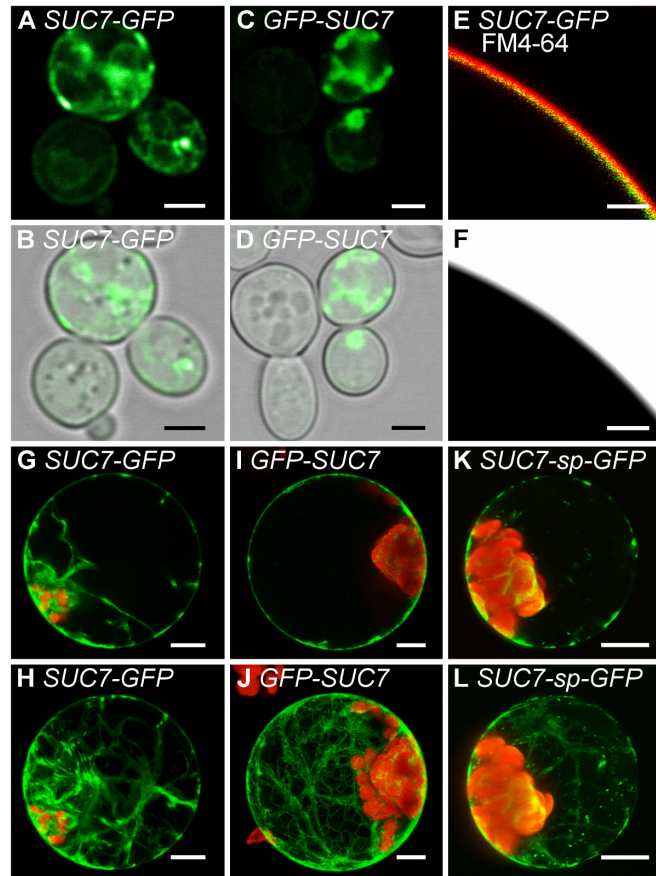

**Supplementary Figure 2: Subcellular localization of *AtSUC7*<sub>Col-0</sub> in different expression systems.** (A) Confocal image of yeasts expressing *AtSUC7-GFP*. (B) Bright field overlay to A. (C) Confocal image of yeasts expressing *GFP-AtSUC7*. (D) Bright field overlay to C. (E) Confocal image of a *Xenopus laevis* oocyte expressing *AtSUC7-GFP*. FM4-64 (red) labeled the plasma membrane and did not colocalize with *AtSUC7-GFP*. (F) Bright field to E. (G-L) Confocal images of Arabidopsis mesophyll protoplasts transformed with the indicated *GFP* fusion constructs of *AtSUC7* under the control of the *35S* promoter. sp = spacer. GFP is given in green, chlorophyll autofluorescence in red. (G, I, K) Single optical sections. (H, J, L) Maximum projections. Scale bars: 2.5  $\mu$ m in A-D; 50  $\mu$ m in E and F; 10  $\mu$ m in I-L.

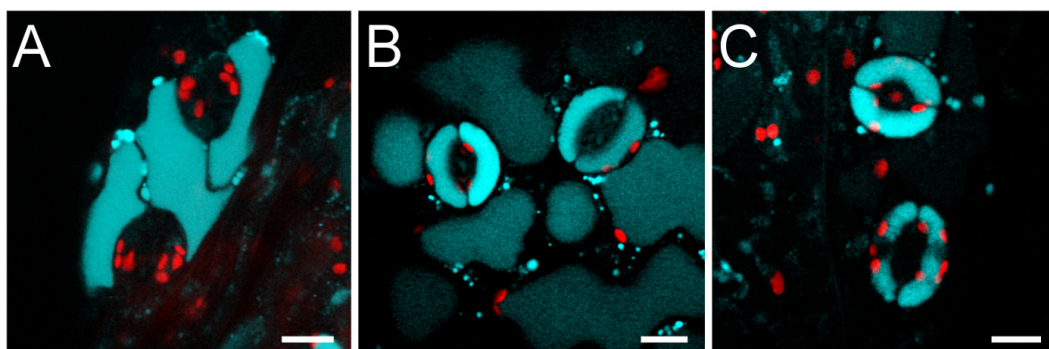

**Supplementary Figure 3: Analysis of esculin uptake into epidermis cells of the stomatal complex.** Epidermal peels of Col-0 leaves of different developmental stages were incubated with 1-mM esculin in W5 for 1 h prior to confocal microscopy. Esculin is given in cyan, chlorophyll fluorescence in red. (A) Small leaf (<3 mm) with esculin uptake into subsidiary cells. (B) Medium-sized leaf (transition from sink to source) with esculin in subsidiary cells and guard cells. (C) Source leaf with esculin accumulating in guard cells only. Scale bars: 10  $\mu$ m



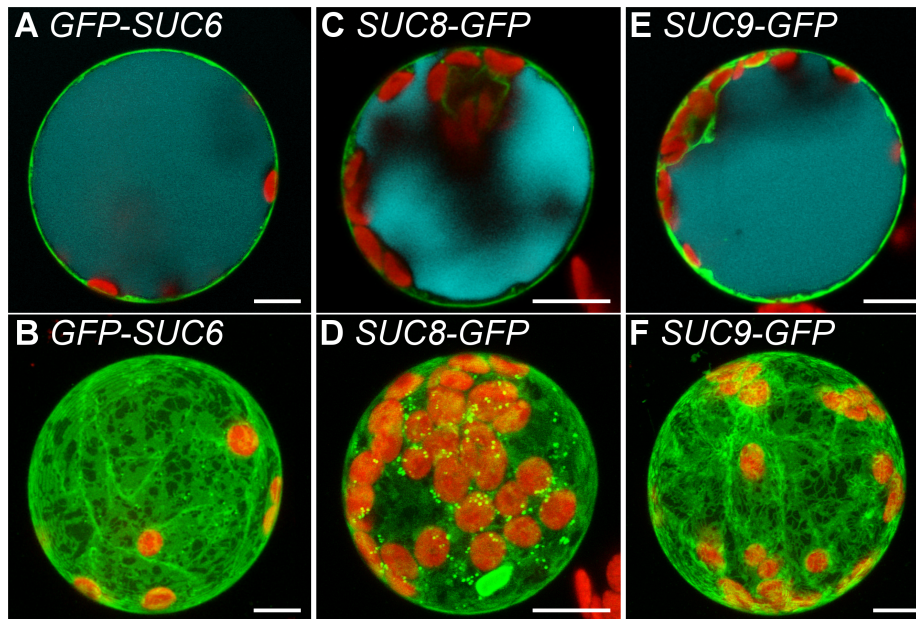

**Supplementary Figure 4: Confocal images of the subcellular localization of GFP-AtSUC6<sub>Col-0</sub>, AtSUC8-GFP and GFP-AtSUC9 in Arabidopsis protoplasts.** (A, C, E) Single optical sections of mesophyll protoplasts expressing the indicated construct under the control of the 35S promoter. (B, D, F) Maximum projections of protoplasts expressing the indicated constructs. GFP is shown in green, chlorophyll autofluorescence in red. Scale bars: 10 μm

**Supplementary Table 3: Primers used for the detection of *AtSUC* transcripts in the T-DNA insertion lines *Atsuc6.3* and *Atsuc7.3* by RT-PCR.**

| Mutant line     | Amplified allele | Primer name   | Primer sequence                              |
|-----------------|------------------|---------------|----------------------------------------------|
| <i>Atsuc6.3</i> | upstream         | AtSUC6c+9f    | 5'-ACCTCCAAGCAAACAAAGATGCAG-3'               |
|                 |                  | AtSUC6c+622r  | 5'-GCGCAATAGATGTCGCATGCTT-3'                 |
|                 | downstream       | AtSUC6g+1364f | 5'-CGTTCGCGCTAGCTTCCATAATC-3'                |
|                 |                  | AtSUC6c+1521r | 5'-CATGTATGGGTCCTTATCTAGTGCTACAATAA-3'       |
|                 | traversing       | AtSUC6g+911f  | 5'-GTCGTGAGGTGTACGGTGGAGAC-3'                |
|                 |                  | AtSUC6g+1875r | 5'-ACCACAAATCCTGGTAAATTCAC-3'                |
| <i>Atsuc7.3</i> | upstream         | AtSUC7-32f    | 5'-GCATATATAATAAATAAAAACGCATAAACTTTTTAAGG-3' |
|                 |                  | AtSUC7g+1107r | 5'-GGAGCTGTGAATATTATTCTCGCCGTG-3'            |
|                 | downstream       | AtSUC7g+1787f | 5'-CATGGCAATTGTCATACCACAAATG-3'              |
|                 |                  | AtSUC7c+1507r | 5'-GCATATATAATAAATAAAAACGCATAAACTTTTTAAGG-3' |
|                 | traversing       | AtSUC7c+1032f | 5'-TGGTATTGAAGGTATTAGTTAGGAAGATGGGA-3'       |
|                 |                  | AtSUC7c+1507r | 5'-GCATATATAATAAATAAAAACGCATAAACTTTTTAAGG-3' |

**Supplementary Table 4: List of primers used for generation of *pAtSUC:AtSUCg-GUS*, *pAtSUC:AtSUCg-GFP* and *pAtSUC7:GUS* reporter lines.**

| Gene          | Primer name       | Primer sequence                          |
|---------------|-------------------|------------------------------------------|
| <i>AtSUC6</i> | AtSUC6-2547f+CACC | 5'-CACCGTGGGAATTTACCAGGATTTGTGGT-3'      |
|               | AtSUC6c+1476r     | 5'-TGGTAAAACGGAAAATGCCACAAC-3'           |
| <i>AtSUC7</i> | AtSUC7-1896f+CACC | 5'-TATAGGTGCGGCAAAAACAAACCC-3'           |
|               | AtSUC7c+1473r     | 5'-GCAGTATTGTTGGCATTACCGTTTACCT-3'       |
|               | AtSUC7-1896f+SbfI | 5'-ACCTGCAGGTATAGGTGCGGCAAAAACAAACCC-3'  |
|               | AtSUC7-1r+Ascl    | 5'-TGGCGCGCCCTTCTTACCCTTGTCTTAGAGGTTG-3' |



**A**

|                       |      |                               |       |                                 |
|-----------------------|------|-------------------------------|-------|---------------------------------|
| SUC1                  | (55) | TPYVQLLGIPHKWSSLIWLCGPVSGMIV  | (423) | FSTPFALASIFSSCSGAGQGLSLGVLNLAI  |
| SUC2                  | (54) | TPYVQLLGIPHKWASLIWLCGPISGMIV  | (422) | FSIPFALASIFSTNSGAGQGLSLGVLNLAI  |
| SUC3                  | (85) | TPYIQTLGISHAFSSFIWLCGPITGLVV  | (506) | YSVPF SVTAEVTADSGGGQGLAIGVLNLAI |
| SUC4                  | (65) | TPYVQELGIPHAWASVIWLCGPLSGLEFV | (425) | YSVPYALISIRIESLGLGQGLSLGVLNLAI  |
| SUC5                  | (56) | TPYIQLLGIPHKWSSYMWLCGPISGMIV  | (422) | YSIPFALASIFSTNSGAGQGLSLGVLNIAI  |
| SUC6                  | (55) | TPYVQLLGVPHKWSSFIWLCGPISGLLV  | (418) | FSIPFALASIISSSSGAGQGLSLGVLNMAI  |
| SUC8                  | (55) | TPYVQLLGVPHKWSSFIWLCGPVSGLLV  | (418) | FSIPFALASIISSSSGAGQGLSLGVLNMAI  |
| SUC9                  | (55) | TPYVQLLGVPHKWSSFIWLCGPISGLLV  | (417) | FSIPFALASIISSSSGAGQGLSLGVLNMAI  |
| SUC7 <sub>Col-0</sub> | (54) | TPYVQLLGVPHKWFSFIWLCGPVSGLLV  | (417) | FSIPFALASIISSSSGAGQRLSLGVLNMAI  |
| SUC7 <sub>Ws</sub>    | (54) | TPYVQLLGVPHKWSSFIWLCGPVSGLLV  | (417) | FNIPFALASIISSSSDAGQGLSLGVLNMAI  |

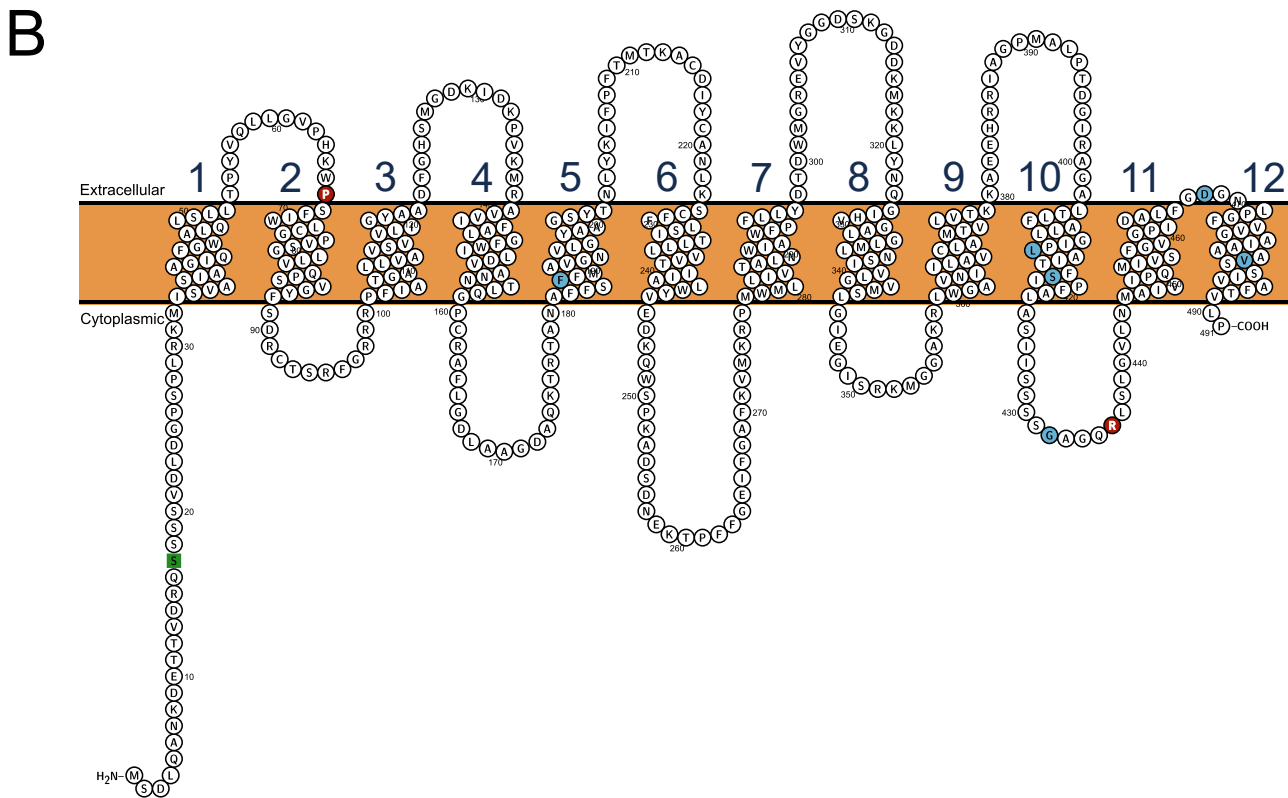

**Supplementary Figure 5: Sequence alignment of different Arabidopsis SUCs and predicted transmembrane structure of AtSUC7. (A)** Alignment of two regions of the Col-0 protein sequences of all Arabidopsis SUCs. The AtSUC7 sequence is additionally given for ecotype Ws. The two amino acids conserved in all AtSUCs but differing in AtSUC7<sub>Col-0</sub> are indicated by red rectangles. Green rectangles mark the amino acids point mutated in constructs AtSUC2<sub>A67P/G441R</sub> and AtSUC5<sub>S69P/G441R</sub>. **(B)** Topological model of AtSUC7<sub>Col-0</sub> predicted and visualized using Protter (Omasits et al., 2013). Amino acids of AtSUC7<sub>Col-0</sub> differing from the conserved ones in all other AtSUCs are labeled in red. Additional amino acid exchanges compared to AtSUC7<sub>Ws</sub> are marked in blue.

**Supplementary Table 5: List of primers used for amplification of AtSUC6<sub>Col-0</sub> and AtSUC7<sub>Col-0</sub> for the generation of constructs for heterologous expression in baker's yeast.**

| Gene          | Primer name          | Primer sequence                                           |
|---------------|----------------------|-----------------------------------------------------------|
| <i>AtSUC6</i> | AtSUC6c+1f+YES+NotI  | 5'-TAGCGGCCGCAAGCTTGATAAAAGAAATGAGTGACCTCCAAGCAAACAAG-3'  |
|               | AtSUC6c+1479rev+NotI | 5'-TAGCGGCCGCTTATGGTAAAACGGAAAATGCCACA-3'                 |
| <i>AtSUC7</i> | AtSUC7c+1f+YES+NotI  | 5'-GCGGCCGCAAGCTTGATAAAAGAAATGAGTGACCTCCAAGCAAACAAGATG-3' |
|               | AtSUC7c+1476r+NotI   | 5'-GCGGCCGCTTAAGTAAAACGGTAAATGCCACAATACTG-3'              |
|               | AtAtSUC7-5'-BspHI-f  | 5'-TCATGAGTGACCTCCAAGCAAACAAG-3'                          |
|               | AtAtSUC7-3'-BspHI-r  | 5'-TCATGACAGGTAACGGTAAATGCC-3'                            |

**Supplementary Table 6:** List of primers used for generation of *AtSUC* fusion constructs with *GFP* for the expression in pro-plasts. Names of the sequencing plasmids, destination vectors and resulting plasmids are listed in column 3, 4 and 5, respectively. If constructs were already published the list contains the name and reference of the respective construct. References: <sup>1</sup>Schneider et al., 2012; <sup>2</sup>Curtis and Grossniklaus, 2003; <sup>3</sup>Dotzauer et al., 2010; <sup>4</sup>Rottmann et al., 2016; <sup>5</sup>Feuerstein et al., 2010; <sup>6</sup>Klepek et al., 2005.

| CDS                  | Primer name                  | Primer sequence                             | Sequencing plasmid | Destination vector  | Plasmid name |
|----------------------|------------------------------|---------------------------------------------|--------------------|---------------------|--------------|
| <b><i>AtSUC1</i></b> | pAF30 <sup>5</sup>           | ( <i>AtSUC1c</i> -pSO35e <sup>6</sup> )     |                    |                     |              |
| <b><i>AtSUC2</i></b> | <i>AtSUC2c</i> +5f+Pcil      | 5'-ATACATGTCAGCCATCCAAATGGAG-3'             | pJET1.2 blunt      | pSB30 <sup>1</sup>  | pSS105       |
|                      | <i>AtSUC2c</i> -3r+Pcil      | 5'-ATACATGTTGGCTGCGTGAAAATCCCATAG-3'        |                    |                     |              |
| <b><i>AtSUC2</i></b> | <i>AtSUC2c</i> +5f+Pcil      | 5'-ATACATGTCAGCCATCCAAATGGAG-3'             | pJET1.2 blunt      | pSB30 <sup>1</sup>  | pTR307       |
| <b><i>AtSUC2</i></b> | <i>AtSUC2c</i> +210r_SDM     | 5'-AATCAGAGAAGGCCAATTTATGTGGG-3'            |                    |                     |              |
| <b><i>AtSUC2</i></b> | <i>AtSUC2c</i> +186f_SDM     | 5'-CCACATAAATGGCCCTTCTGTGAT-3'              |                    |                     |              |
| <b><i>AtSUC2</i></b> | <i>AtSUC2c</i> +1310f_SDM    | 5'-GTGCCGGCCAAAAGACTTTCC-3'                 |                    |                     |              |
| <b><i>AtSUC2</i></b> | <i>AtSUC2c</i> +1329r_SDM    | 5'-GGAAGTCTTTGGCCGGCAC-3'                   |                    |                     |              |
| <b><i>AtSUC2</i></b> | <i>AtSUC2c</i> -3r+Pcil      | 5'-ATACATGTTGGCTGCGTGAAAATCCCATAG-3'        |                    |                     |              |
| <b><i>AtSUC3</i></b> | <i>AtSUC3c</i> +1f+CACC      | 5'-CACCATGAGTGCATCGGTGTCGATCTCG-3'          | pENTR/D-TOPO       | pMDC43 <sup>2</sup> | pTR241       |
|                      | <i>AtSUC3c</i> +1785r        | 5'-TAGCCGATGTGAAAACCGGT-3'                  |                    |                     |              |
| <b><i>AtSUC5</i></b> | <i>AtSUC5c</i> +1f+BspHI     | 5'-ATCATGAGTATGGAGCCTTGGAAAGCAGAA-3'        | pSS87 <sup>1</sup> | pTR302              |              |
| <b><i>AtSUC5</i></b> | <i>AtSUC5c</i> +214r_SDM     | 5'-TGTAAAGACGGCCATTTGAGGG-3'                |                    |                     |              |
| <b><i>AtSUC5</i></b> | <i>AtSUC5c</i> +192f_SDM     | 5'-CCTCACAAAATGGCCGCTTTACA-3'               |                    |                     |              |
| <b><i>AtSUC5</i></b> | <i>AtSUC5c</i> +1309f_SDM    | 5'-GGTCCGGCCAAAAGACTTTTC-3'                 |                    |                     |              |
| <b><i>AtSUC5</i></b> | <i>AtSUC5c</i> +1328r_SDM    | 5'-GAAAATCTTTGGCCGGCAC-3'                   |                    |                     |              |
| <b><i>AtSUC5</i></b> | <i>AtSUC5c</i> +1536r+BspHI  | 5'-ATCATGACATGGAAATCCCATAGCCCTGAC-3'        |                    |                     |              |
| <b><i>AtSUC6</i></b> | <i>AtSUC6c</i> -54f          | 5'-TCATCTCCTCCCTCACCAACACC-3'               | pJET1.2 blunt      | pMDC43 <sup>2</sup> | pFC12        |
|                      | <i>AtSUC6c</i> +622r         | 5'-GGCAATAGATGTGCGATGCTT-3'                 | pENTR/D-TOPO       | pMDC83 <sup>2</sup> | pFC13        |
|                      | <i>AtSUC6c</i> +581f         | 5'-TGGGATATGGCCGGAT-3'                      |                    |                     |              |
|                      | <i>AtSUC6c</i> +1521r        | 5'-CATGTATGGTCCCTTATCTAGTGTACAATAA-3'       |                    |                     |              |
|                      | <i>AtSUC6c</i> +1fw+CACC     | 5'-ACCATGAGTGCATCCAGCAACAAAGA-3'            |                    |                     |              |
|                      | <i>AtSUC6c</i> +1476rev+AscI | 5'-GGGCGCCCTTGGTAAACGGAAAATGCCAAC-3'        |                    |                     |              |
|                      | <i>AtSUC6c</i> +1479rev+AscI | 5'-GGGCGCCCTTATGGTAAACGGAAAATGCCAAC-3'      |                    |                     |              |
| <b><i>AtSUC7</i></b> | <i>AtSUC7</i> -32f           | 5'-GCATATAATAAATAAACAACGCATAAACTTTTAAAGG-3' | pJET1.2 blunt      | pSS87 <sup>1</sup>  | pTR58        |
|                      | <i>AtSUC7c</i> +1507r        | 5'-GCATATAATAAATAAACAACGCATAAACTTTTAAAGG-3' |                    | pCS120 <sup>3</sup> | pTR57        |
|                      | <i>AtSUC7</i> +1f+BspHI      | 5'-TCATGAGTGCATCCAGCAACAAAGA-3'             |                    |                     |              |
|                      | <i>AtSUC7c</i> +1473r+BspHI  | 5'-TCATGACAGGTAAAACGGTAAATGCC-3'            |                    |                     |              |
| <b><i>AtSUC7</i></b> | <i>AtSUC7c</i> +1f+CACC      | 5'-CACCATGAGTGCATCCAGCAACAAAGA-3'           | pENTR/D-TOPO       | pMDC43 <sup>2</sup> | pTR72        |
| <b>-spacer</b>       | <i>AtSUC7c</i> +1473r        | 5'-GCAGTATTGTGGCATTTACCGTTTTACCT-3'         |                    | pMDC83 <sup>2</sup> | pTR73        |
|                      | <i>AtSUC7c</i> +1476r        | 5'-TTAAGGTAAAACGGTAAAATGCCACAATACT-3'       |                    |                     |              |
| <b><i>AtSUC7</i></b> | <i>AtSUC7c</i> +1f+CACC      | 5'-CACCATGAGTGCATCCAGCAACAAAGA-3'           | pENTR/D-TOPO       | pMDC43 <sup>2</sup> | pTR253       |
| <b><i>AtSUC7</i></b> | <i>AtSUC7c</i> +1507r        | 5'-GCATATAATAAATAAACAACGCATAAACTTTTAAAGG-3' |                    |                     |              |
| <b><i>AtSUC7</i></b> | <i>AtSUC7c</i> +1f+CACC      | 5'-CACCATGAGTGCATCCAGCAACAAAGA-3'           | pJET1.2 blunt      | pMDC43 <sup>2</sup> | pTR244       |
| <b><i>AtSUC7</i></b> | <i>AtSUC7c</i> +203r_SDM     | 5'-GATGACCAATTTGTGTTGGACTC-3'               | pENTR/D-TOPO       |                     |              |
| <b><i>AtSUC7</i></b> | <i>AtSUC7c</i> +182f_SDM     | 5'-GAGTCCCACACAAAATGGTCAATC-3'              |                    |                     |              |
|                      | <i>AtSUC7c</i> +1476r        | 5'-TTAAGGTAAAACGGTAAAATGCCACAATACT-3'       |                    |                     |              |
| <b><i>AtSUC7</i></b> | <i>AtSUC7c</i> +1f+CACC      | 5'-CACCATGAGTGCATCCAGCAACAAAGA-3'           | pJET1.2 blunt      | pMDC43 <sup>2</sup> | pTR245       |
| <b><i>AtSUC7</i></b> | <i>AtSUC7c</i> +1315r_SDM    | 5'-GAGAAAGTCTTGACCGCCGCG-3'                 | pENTR/D-TOPO       |                     |              |
| <b><i>AtSUC7</i></b> | <i>AtSUC7c</i> +1295f_SDM    | 5'-GGCCGGTCAAGGACTTTTCTC-3'                 |                    |                     |              |
|                      | <i>AtSUC7c</i> +1476r        | 5'-TTAAGGTAAAACGGTAAAATGCCACAATACT-3'       |                    |                     |              |

|                   |                     |                                                    |                   |                     |        |
|-------------------|---------------------|----------------------------------------------------|-------------------|---------------------|--------|
| <b>AISUC7</b>     | AISUC7c+1f+CACC     | 5'-CACCATGAGTGACCTCCAAGCAAAACAAGA-3'               | pENTR/D-TOPO      | pMDC43 <sup>2</sup> | pTR181 |
| <b>P67S/R436G</b> | AISUC7c+1476r       | 5'-TTAAGGTAAAACGGTAAATGCCACAA TACT-3'              |                   |                     |        |
| <b>AISUC8</b>     | AISUC8c+1f+CACC     | 5'-CACCATGAGTGACCTCCAAGCAAAACAAG-3'                | pENTR/D-TOPO      | pMDC43 <sup>2</sup> | pND100 |
|                   | AISUC8c-3'r-wob     | 5'-GGATCMWAGGTAAACACCGTAAATGC-3'                   |                   | pMDC83 <sup>2</sup> | pND101 |
| <b>AISUC9</b>     | AISUC9c+1f+BspHI    | 5'-TCAATGAGTGACATCCAAGCAAAAGAAAG-3'                | pJET1.2 blunt     | pSS87 <sup>1</sup>  | pTR318 |
|                   | AISUC9c+1473r+BspHI | 5'-TCAATGACAGGTAAAACGGTAAGTGCC-3'                  | pCR-Blunt II-TOPO | pCS120 <sup>3</sup> | pND98  |
| <b>STP10</b>      | pTR147 <sup>4</sup> | (STP10c-pMDC43 <sup>2</sup> )                      |                   |                     |        |
| <b>SWEET4</b>     | SWEET4c+1f+NcoI     | 5'-ATGGTTAACGCTACAGTTGCCGAGAAAA-3'                 | pJET1.2 blunt     | pCS120 <sup>3</sup> | pTR264 |
|                   | SWEET4c+753r+NcoI   | 5'-GTGGACAAGCTAAAACGATTTTCAGCT-3'                  |                   |                     |        |
| <b>SWEET10</b>    | SWEET10c+1f+NcoI    | 5'-ATCCATGGCAATTTCAAGCCCGTCTT-3'                   | pJET1.2 blunt     | pCS120 <sup>3</sup> | pTR311 |
|                   | SWEET10c+867r+NcoI  | 5'-ATCCATGGCAATTTAGAAAATGAGAAAATACTTCTTTTTCATCC-3' |                   |                     |        |



## Literature cited

- Curtis, M. D., and Grossniklaus, U. (2003). A Gateway cloning vector set for high-throughput functional analysis of genes in planta. *Plant Physiol* 133, 462–469
- Dotzauer, D., Wolfenstetter, S., Eibert, D., Schneider, S., and Sauer, N. (2010). Novel PSI domains in plant and animal H<sup>+</sup>-inositol symporters. *Traffic* 11, 767–781
- Feuerstein, A., Niedermeier, M., Bauer, K., Engelmann, S., Hoth, S., Stadler, R., and Sauer, N. (2010). Expression of the *AtSUC1* gene in the female gametophyte, and ecotype-specific expression differences in male reproductive organs. *Plant Biol* 12, 105–114
- Klepek, Y.-S., Geiger, D., Stadler, R., Klebl, F., Landouar-Arsivaud, L., Lemoine, R., Hedrich, R., and Sauer, N. (2005). Arabidopsis POLYOL TRANSPORTER5, a new member of the monosaccharide transporter-like superfamily, mediates H<sup>+</sup>-symport of numerous substrates, including myo-inositol, glycerol, and ribose. *Plant Cell* 17, 204–218
- Omasits, U., Ahrens, C. H., Müller, S., and Wollscheid, B. (2014). Protter: interactive protein feature visualization and integration with experimental proteomic data. *Bioinformatics* 30, 884-886
- Rottmann, T., Zierer, W., Subert, C., Sauer, N., and Stadler, R. (2016). *STP10* encodes a high-affinity monosaccharide transporter and is induced under low-glucose conditions in pollen tubes of Arabidopsis. *J Exp Bot* 67, 2387–2399
- Schneider, S., Hulpke, S., Schulz, A., Yaron, I., Höll, J., Imlau, A., Schmitt, B., Batz, S., Wolf, S., Hedrich, R., et al. (2012). Vacuoles release sucrose via tonoplast-localised SUC4-type transporters. *Plant Biol* 14, 325–336
